# Supplementary material for: Factors influencing medication adherence among hypertensive patients: A qualitative study
Source: Research Square preprint supplement (doi:10.21203/rs.3.rs-4294186/v1), 2024-04-23
Supplement: Supplementary file 1 [file 17c2b420856e725588c7cc9b.docx]

**Tables**

**Table 1: Demographics of study participants**

| **Description N=10**  **Sex**  Female 7(70%)  Male 3(30%)  **Age range (in years)**  44-48 4(40%)  49-53 3(30%)  54-58 0(0%)  59-63 0(0%)  64-68 1(10%)  69-73 1(10%)  74-78 1(10%)  **Profession**  Housewife 3(30%)  Farmer 2(20%)  Driver 1(10%)  Trader 3(30%)  Builder 1(10%)  **Level of Education**  Never been to School 7(70%)  Primary 3(30%)  **Marital Status**  Single 1(10%)  Married 8(80%)  Widow 1(10%)  **Duration of illness (in years)**  1-5 6(60%)  6-10 3(30%)  11-15 1(10%) |
| --- |
